# Supplementary material for: Effects of Salt Stress on the Antioxidant Activity and Malondialdehyde, Solution Protein, Proline, and Chlorophyll Contents of Three Malus Species
Source: Life (Basel). 2022 Nov 18;12(11):1929. doi: 10.3390/life12111929 (PMC9696785; doi:10.3390/life12111929)
Supplement: Supplementary file 1 [file life-12-01929-s001.zip › Supplementary tables.xlsx]

## Sheet: Table S1
Table S1. ANOVA analysis of physiological parameters in leaves for the three Malus species
Genotype	Treatment	SOD (U/g, FW)				POD (U/g, FW)				CAT (U/g, FW)				MDA (nmol/g, FW)				SP (mg/g, FW)				PRO (ug/g, FW)				CHLa (mg/g, FW)				CHLb (mg/g, FW)
		0d	4d	8d	12d	0d	4d	8d	12d	0d	4d	8d	12d	0d	4d	8d	12d	0d	4d	8d	12d	0d	4d	8d	12d	0d	4d	8d	12d	0d	4d	8d	12d
M. zumi	0	132.039	159.67b	180.68ab	125.82b	7.03937	8.58b	10.04b	8.32bc	56.8721	82.85c	82.41bc	101.30ab	9.90723	9.63153	9.96458	8.82ab	96.0644	97.94d	108.08b	108.94b	122.64	91.39c	89.90c	108.718	1.17879	1.34353	1.38256	1.42a	0.496889	0.52	0.534302	0.60a
	0.002		191.41ab	172.48bc	162.55a		9.01b	10.90b	6.66c		93.30c	51.64c	80.21b		10.9852	10.2586	6.78b		114.98c	110.84b	108.22b		118.54b	108.24b	111.473		1.39456	1.28624	1.10b		0.53	0.5	0.43c
	0.004		207.46a	138.90c	154.65a		21.52a	15.99a	10.25a		128.79b	101.73b	79.90b		11.4627	10.9554	8.38ab		122.47b	122.43a	118.85a		124.67ab	94.69bc	95.1587		1.24764	1.2785	1.12b		0.52918	0.53	0.45c
	0.006		218.92a	211.38a	136.83b		22.67a	12.11b	9.97ab		189.50a	152.42a	108.18a		11.3819	10.5401	10.60a		168.14a	97.48c	108.59b		138.92a	144.80a	97.2982		1.25951	1.26926	1.21b		0.5	0.55	0.54b
Genotype mean			194.36	175.86	144.96		15.45	12.26	8.8		123.61	97.05	92.42		10.87	10.43	8.65		125.88	109.71bc	111.15		118.38	109.41	103.16		1.31	1.31	1.21		0.52	0.53	0.51
M. sieversii	0	162.013	147.81b	91.73c	124.97b	8.73123	8.48b	12.18a	8.38a	107.523	59.35b	76.20c	79.98c	12.7468	11.28b	12.0945	12.57ab	104.136	92.96c	135.11a	129.10a	123.555	97.7669	90.97c	99.92a	1.20305	1.54a	1.54a	1.52a	0.49189	0.62a	0.64a	0.62a
	0.002		172.80b	192.55ab	158.43a		9.56b	8.84b	6.03b		69.83b	58.12c	66.08d		14.39a	12.8825	10.34c		130.98b	114.69b	127.75a		93.4869	97.77b	96.12b		1.26b	1.11c	1.27b		0.53b	0.46c	0.54b
	0.004		175.38b	191.11b	172.21a		13.61a	11.41a	9.41a		207.58a	135.41b	100.72b		16.14a	12.7603	11.47bc		170.17a	135.98a	108.51c		94.9071	94.88b	97.17ab		1.26b	1.30b	1.24b		0.52b	0.55bc	0.55b
	0.006		220.72a	221.81a	178.94a		14.13a	12.59a	9.23a		208.13a	200.19a	158.27a		14.40a	14.0645	13.97a		164.15a	131.48a	118.67b		95.2672	111.85a	99.38a		1.31b	1.37b	1.29b		0.54b	0.57ab	0.52b
Genotype mean			179.18	174.3	158.64		11.45	11.25	8.26		136.22	117.48	101.26		14.05	12.95a	12.09a		139.56	129.32a	121.01		95.36	98.87	98.15		1.34	1.33	1.33		0.55	0.56	0.56
M. baccata	0	154.603	125.40b	107.64c	89.87c	5.7174	10.11d	8.67b	5.88c	65.8682	65.85b	61.41b	66.98b	11.6483	12.49b	13.20b	11.80c	109.024	108.71b	111.06bc	101.00c	92.9418	116.60ab	97.68b	98.2513	1.14725	1.48a	1.45a	1.56a	0.489327	0.65a	0.587032	0.68a
	0.002		152.46ab	117.14bc	126.69bc		12.18c	8.08b	6.93c		80.59b	77.74b	77.53b		9.15c	12.66b	12.92b		104.02b	106.94c	112.90b		102.66b	102.37b	109.688		1.37ab	1.42ab	1.11b		0.57a	0.56	0.47b
	0.004		150.50ab	141.79ab	132.19ab		26.93b	18.86a	8.51b		110.15a	72.89b	51.02c		14.31a	15.17ab	13.46b		101.82b	117.99ab	128.32a		112.39ab	102.10b	111.557		1.45a	1.47a	1.09b		0.63a	0.59	0.46b
	0.006		173.81a	157.15a	155.19a		31.14a	20.44a	19.96a		122.95a	106.92a	98.24a		15.06a	16.98a	14.34a		150.31a	125.06a	107.64bc		124.73a	144.03a	112.379		1.21b	1.23b	1.11b		0.47b	0.524969	0.51b
Genotype mean			150.54	130.93	125.98		20.09	14.01	10.32		94.89	79.74	73.44		12.75	14.50a	13.13a		116.21	115.26ab	112.47		114.09	111.54	107.97		1.38	1.39	1.22		0.58	0.56	0.53
The numbers of treatments represents the mean activity or content of physiological parameters of three replicates, genotype mean represents the mean activity or content of physiological parameters in the same issues of all treatments, lowercase letters of genotype mean indicate significant difference at 0.05 levels among the same tissue belonging to the different Malus species, lowercase letters …

## Sheet: Table S2
Table S2. ANOVA analysis of physiological parameters in roots for the three Malus species
Genotype	Treatment	SOD (U/g, FW)				POD (U/g, FW)				CAT (U/g, FW)				MDA (nmol/g, FW)				SP (mg/g, FW)				PRO (ugl/g, FW)
		0d	4d	8d	12d	0d	4d	8d	12d	0d	4d	8d	12d	0d	4d	8d	12d	0d	4d	8d	12d	0d	4d	8d	12d
M. zumi	0	209.283	250.43c	300.51b	188.17b	6.13626	5.94d	12.31c	12.43c	70.5369	124.80ab	56.81c	80.25b	4.18188	4.63b	4.78ab	4.07ab	29.0208	50.26d	63.06a	39.70b	33.0661	30.29b	35.07a	28.1881
	0.002		333.94b	263.44c	236.32a		11.36c	10.74c	6.20d		100.05b	101.90b	57.81c		5.88a	4.07b	3.82b		64.90b	54.81bc	41.40b		28.64b	30.10b	29.4975
	0.004		402.94a	243.72c	199.09b		32.08b	29.36b	22.30b		145.25a	93.85b	74.01b		5.53ab	4.45ab	4.54a		59.02c	57.25ab	51.85a		34.93ab	30.75ab	30.9116
	0.006		421.30a	343.13a	200.34b		38.73a	47.43a	30.48a		141.24a	129.06a	105.54a		6.24a	5.33a	4.29ab		70.45a	50.08c	49.50a		39.30a	31.81ab	31.9743
Genotype mean			352.15a	287.7	205.99		22.03	24.96	17.85		127.84	95.41	79.4		5.57	4.66	4.18		61.16	56.30ab	45.61b		33.29	31.93	30.14
M. sieversii	0	213.97	182.68b	258.19a	180.08b	5.29256	25.26d	11.74c	15.77c	71.2158	37.89d	75.11c	35.60b	3.79968	3.16c	3.36c	2.78b	36.9606	44.33b	43.16b	48.21a	33.0944	33.09b	31.9327	28.80b
	0.002		234.68a	172.76b	182.81b		40.29c	24.07c	25.41b		68.82c	66.16c	43.76b		4.17b	4.37b	4.60a		46.31ab	41.35b	45.43a		31.94b	35.7491	33.72ab
	0.004		239.84a	278.23a	195.94b		59.51b	48.18b	25.36b		175.94b	120.86b	88.68a		2.44d	5.16a	3.30b		50.10a	54.81a	39.59b		33.02b	34.2821	30.41b
	0.006		251.62a	275.49a	245.63a		86.47a	62.08a	51.90a		192.88a	140.65a	74.06a		5.06a	5.27a	4.41a		49.89ab	60.52a	49.59a		44.35a	34.1852	36.30a
Genotype mean			227.21b	246.17	201.11		52.88	36.52	29.61		118.88	100.69	60.53		3.71	4.54	3.77		47.66	49.96bc	45.71b		35.6	34.04	32.31
M. baccata	0	183.283	246.78c	285.11b	180.33b	15.6985	5.51d	13.88c	12.17d	60.9178	87.40b	135.00a	64.37ab	2.21777	4.12bc	4.14b	3.72b	49.4903	47.00b	56.43c	48.59b	33.1764	32.09b	32.4502	29.6565
	0.002		262.58c	311.83b	232.79a		20.11c	49.50b	18.65c		124.79a	70.69c	48.01c		3.22c	3.90b	2.76a		47.84b	68.20b	63.75a		31.27b	32.0264	29.1333
	0.004		316.35b	287.03b	229.07a		55.10b	53.86b	26.81b		128.00a	93.67b	55.28bc		5.06ab	5.47a	3.91a		72.85a	72.95ab	55.08b		46.46a	34.4651	36.9186
	0.006		373.51a	366.79a	261.90a		72.01a	63.77a	48.85a		131.08a	102.97b	71.80a		6.12a	5.90a	3.94a		68.77a	77.70a	65.49a		48.86a	35.4984	35.3358
Genotype mean			299.80b	312.69	226.02		38.18	45.25	26.62		117.82	100.58	59.86		4.63	4.85	3.58		59.11	68.82a	58.23a		39.67	33.61	32.76
The numbers of treatments represents the mean activity or content of physiological parameters of three replicates, genotype mean represents the mean activity or content of physiological parameters in the same issues of all treatments, lowercase letters of genotype mean indicate significant difference at 0.05 levels among the same tissue belonging to the different Malus species, lowercase letters …
